# Supplementary material for: Mechanisms Underlying Interactions Between Low-Frequency Oscillations and Beat-to-Beat Variability of Celullar Ventricular Repolarization in Response to Sympathetic Stimulation: Implications for Arrhythmogenesis
Source: PubMed Central journal article supplement (PMC6687852; doi:10.3389/fphys.2019.00916), 2019-08-02
Supplement: Data_Sheet_3.pdf [file Data_Sheet_3.pdf]

# **Supplementary Material:**

## **Mechanisms underlying interactions between low-frequency oscillations and beat-to-beat variability of cellular ventricular repolarization in response to sympathetic stimulation: Implications for arrhythmogenesis**

### **1 SUPPLEMENTARY DATA**

#### **1.1 Stochastic version of the ORd Model**

Stochasticity was incorporated into the human ventricular ORd model (O’Hara et al., 2011), after having replaced the original  $I_{Na}$  formulation with the corresponding expression in the (ten Tusscher and Panfilov, 2006) model, as performed in other studies published in the literature (Pueyo et al., 2016; Deo et al., 2013; Priest et al., 2016).

In this work, stochastic fluctuations in ion channel gating were included in four major ionic currents active during AP repolarization, namely: the rapid delayed rectifier  $K^+$  current  $I_{Kr}$ , the slow delayed rectifier  $K^+$  current  $I_{Ks}$ , the transient outward  $K^+$  current  $I_{to}$  and the L-type  $Ca^{2+}$  current  $I_{CaL}$ . Ordinary differential equations (ODEs) of gating variables in the ORd model were converted into stochastic differential equations (SDEs), following the subunit-based approach described in (Pueyo et al., 2011), with continuous resampling of the Wiener increments to guarantee feasible values of the gating variables.

For a gating variable  $x_s$ , the evolution of the probability of this gate being open was calculated as:

$$dx_s(t) = \frac{x_{s\infty} - x_s}{\tau_s} dt + \frac{\sqrt{x_{s\infty} + (1 - 2x_{s\infty})x_s}}{\sqrt{\tau_s N_s}} dw \quad (S1)$$

The number of channels  $N_s$  of each ionic species “s” was computed as follows. For  $I_{Ks}$ ,  $I_{Kr}$  and  $I_{to}$ , experimentally measured unitary conductance values were available and were used to calculate  $N_s$  as the maximum conductance of ion channel “s” in the ORd model, denoted by  $G_s$ , divided by the unitary conductance of ion channel “s”, denoted by  $g_s$ . Table S1 presents the values used in the computations, where values for  $G_s$  correspond to the epicardial version of the ORd model and a capacitance value of  $C_m = 153.4$  pF, and values for  $g_s$  are taken from (Pueyo et al., 2011), (Veldkamp et al., 1995), (Fedida and Giles, 1991) and adjusted to temperature and/or extracellular  $K^+$  concentration following (Shibasaki, 1987), (Nakayama and Irisawa, 1985).

For  $I_{CaL}$  the number of channels was computed by dividing the maximum  $I_{CaL}$  current by the single-channel current  $i_{CaL}$  times the channel opening probability. Considering the value of  $i_{CaL} = -0.12$  pA for  $V = 0$  mV and  $[Ca^{2+}] = 2$  mM reported in (Guia et al., 2001), the calculated number of  $I_{CaL}$  channels was  $N_{CaL} = 20121 \simeq 20000$ .

**Table S1.** Number of channels for  $I_{Ks}$ ,  $I_{Kr}$  and  $I_{to}$ 

|          | $G_s$ (pS) | $g_s$ (pS) | $N_s$       |
|----------|------------|------------|-------------|
| $I_{Ks}$ | 1140       | 6.74       | <b>169</b>  |
| $I_{Kr}$ | 9174       | 2.53       | <b>3621</b> |
| $I_{to}$ | 12272      | 20.2644    | <b>606</b>  |

## 1.2 Current through stretch-activated channels

The current through stretch-activated channels (SACs) was defined as the current through  $K^+$ -selective and non-specific cationic SACs. A linear time-independent formulation was used for the current through non-selective cationic SACs (Benoist et al., 2014; Healy and Mcculloch, 2005):

$$I_{SAC,ns} = G_{SAC}((\lambda - 1)/(\lambda_{max} - 1))(V - E_{SAC,ns}), \quad \text{if } \lambda > 1 \quad (S2)$$

$$I_{SAC,ns} = 0, \quad \text{if } \lambda < 1 \quad (S3)$$

where  $\lambda$  is the ratio between sarcomere length (SL) and the resting SL defined in the model and  $\lambda_{max}$  is set to 1.1 (Benoist et al., 2014; Weise and Panfilov, 2013). The reversal potential  $E_{SAC,ns}$  was set to -10 mV (Kamkin et al., 2000; Isenberg et al., 2003) and the conductance  $G_{SAC,ns}$  to 0.006 nS/pF for physiological as well as mild and moderate disease conditions (Kohl et al., 1998, 1999). When simulating severe disease conditions,  $G_{SAC,ns}$  was set to 0.01 nS/pF following studies showing higher stretch sensitivity of these channels in disease (Kamkin et al., 2000). The current through  $K^+$ -selective SACs was modeled as an outwardly-rectifying current (Benoist et al., 2014; Healy and Mcculloch, 2005):

$$I_{SAC,K} = G_{SAC}((\lambda - 1)/(\lambda_{max} - 1))(1/(1 + \exp((V - 19.05)/29.98))), \quad \text{if } \lambda > 1 \quad (S4)$$

$$I_{SAC,K} = 0, \quad \text{if } \lambda < 1 \quad (S5)$$

The conductance  $G_{SAC,K}$  was set to match experimental current values measured in epicardium (Tan et al., 2004).

## 1.3 Simulation of $\beta$ -adrenergic stimulation and mechanical stretch effects

Phasic  $\beta$ AS at 0.1 Hz was simulated by stimulating the cell with isoproterenol (ISO) following periodic stepwise variations, i.e. ISO was simulated to be present at a concentration of 1  $\mu$ M during 5 s and absent during the remaining 5 s (Fig. S1, top panel). This is in accordance with published experimental patterns of muscle sympathetic nerve activity in response to increased sympathetic activity (Pagani et al., 1997).

Phasic stretch at 0.1 Hz was simulated by varying the stretch ratio  $\lambda$  ( $\lambda$  calculated as SL normalized by resting SL) following a sinusoidal waveform of period equal to 10 s and maximal value of 1.1, thus representing maximal stretch of 10% (Fig. S1, bottom panel). This is in line with percentages tested in published experimental studies (Iribe et al., 2014).

The temporal evolution of APD during baseline and in response to Sympathetic Provocation (SP) is illustrated in Fig. S2 for one human ventricular cell of our population under mild disease conditions. An increase in both BVR and the magnitude of LF oscillations in response to SP can be appreciated (Fig. S1).

## 1.4 Physiological and disease conditions

Disease conditions were simulated by reduced repolarization reserve (RRR) and  $\text{Ca}^{2+}$  overload as well as by varying the conductance  $G_{\text{SAC,ns}}$  of non-specific cationic SACs under severe disease conditions. RRR was simulated as inhibition of  $I_{Ks}$  and  $I_{Kr}$  currents.  $\text{Ca}^{2+}$  overload was simulated by increasing the extracellular  $\text{Ca}^{2+}$  concentration,  $\text{Ca}_o^{2+}$ . Under severe disease conditions,  $G_{\text{SAC,ns}}$  was increased from 0.006 to 0.01 nS/pF. Table S2 summarizes our simulation of physiological as well as mild, moderate and severe disease conditions.

**Table S2.** Simulation of RRR and  $\text{Ca}^{2+}$  overload and  $G_{\text{SAC,ns}}$  conductance value for physiological as well as mild, moderate and severe disease conditions.

|               | RRR                   |                       | $\text{Ca}^{2+}$ overload<br>(factor on $\text{Ca}_o^{2+}$ ) | $G_{\text{SAC,ns}}$<br>(nS/pF) |
|---------------|-----------------------|-----------------------|--------------------------------------------------------------|--------------------------------|
|               | $I_{Ks}$<br>(% Block) | $I_{Kr}$<br>(% Block) |                                                              |                                |
| Physiological | 0                     | 0                     | 1                                                            | 0.006                          |
| Mild          | 20                    | 7.5                   | 1.5                                                          | 0.006                          |
| Moderate      | 60                    | 22.5                  | 2.5                                                          | 0.006                          |
| Severe        | 80                    | 30                    | 4                                                            | 0.01                           |

## 1.5 Data Sheet 1: Population of virtual cells indicating the pro-arrhythmic models distribution (figure-11-master.zip)

This Data Sheet contains the ionic factors associated with each virtual cell, both for the group presenting and the group not presenting pro-arrhythmic events (as shown in Figure 11).

## 1.6 Data Sheet 2: Automatic Relevance Determination (automatic-relevance-master.zip).

This Data Sheet presents the Python code used to unravel individual and common factors, in form of ionic conductance levels, contributing to Beat-to-beat Variability of Repolarization and Low-Frequency Oscillations.

## 2 SUPPLEMENTARY TABLES AND FIGURES

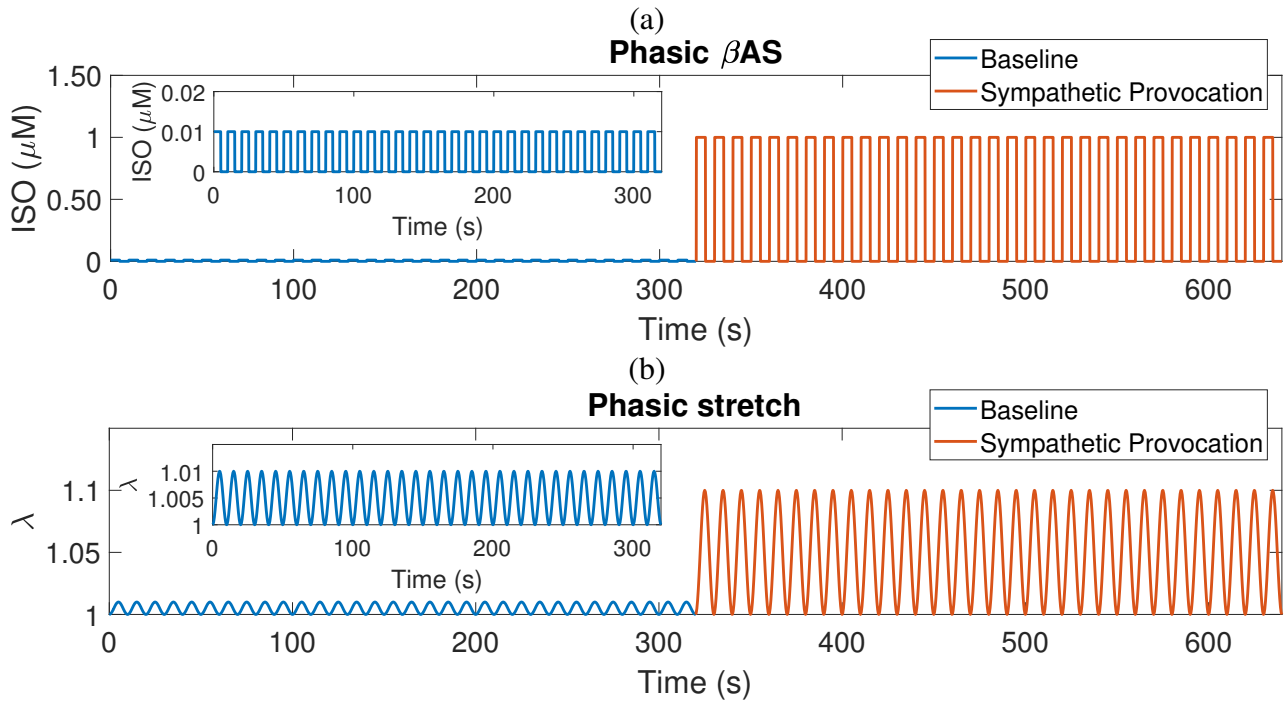

**Figure S1.** Simulation of 0.1 Hz phasic  $\beta$ AS and stretch effects at baseline and following sympathetic provocation: (a) ISO dose and (b) stretch ratio  $\lambda$ .

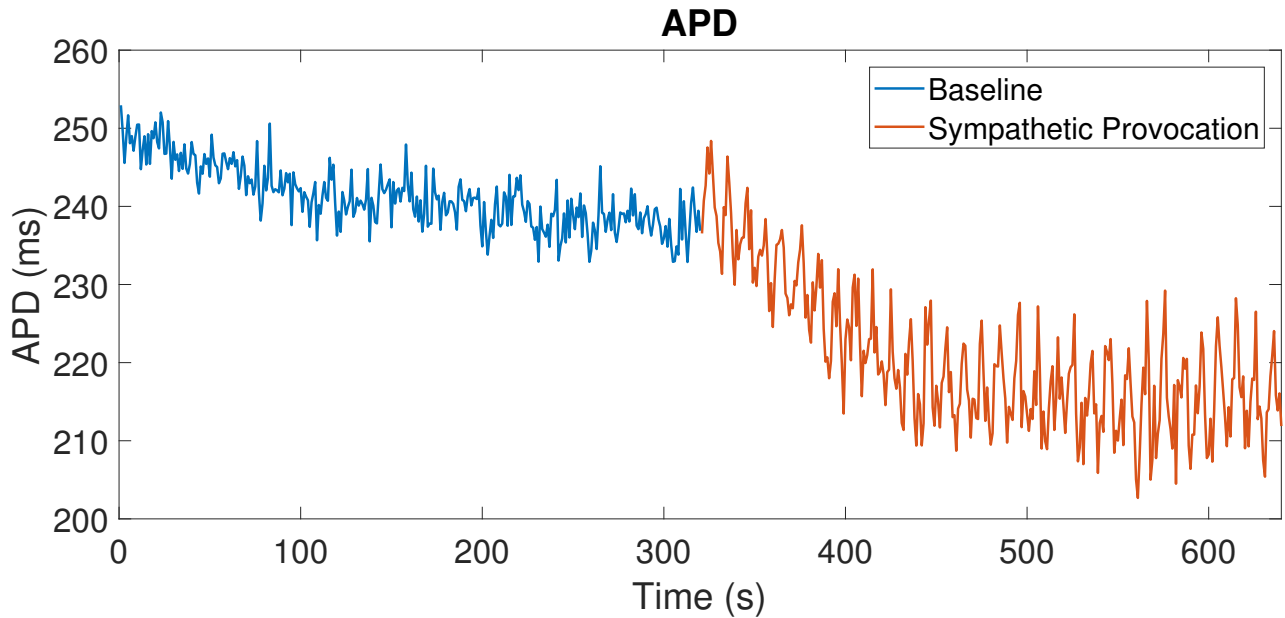

**Figure S2.** Simulated APD series representative of baseline and sympathetic provocation phases (0.1 Hz phasic  $\beta$ AS and stretch effects) for a virtual cell of the population under mild disease conditions.

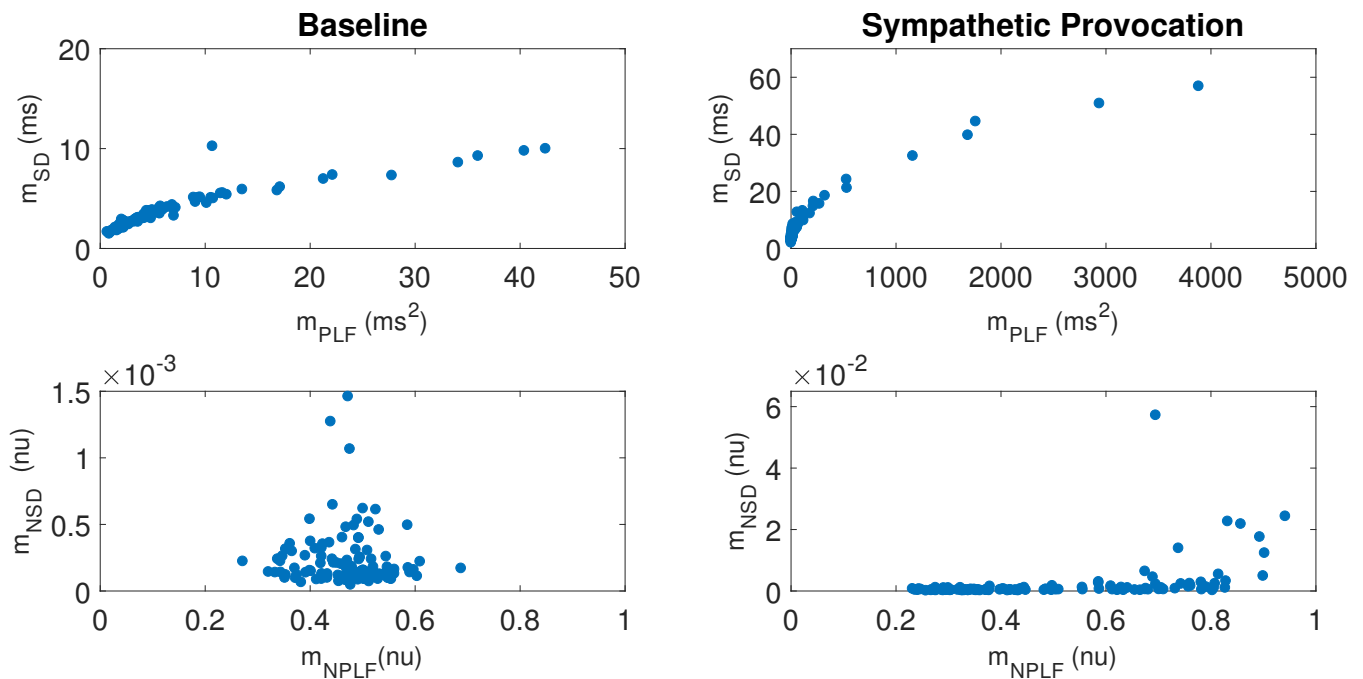

**Figure S3.** Relationship between  $m_{SD}$  and  $m_{PLF}$  (top) and  $m_{NSD}$  and  $m_{NPLF}$  (bottom) at baseline and following sympathetic provocation for the population of models under simulated mild disease conditions.

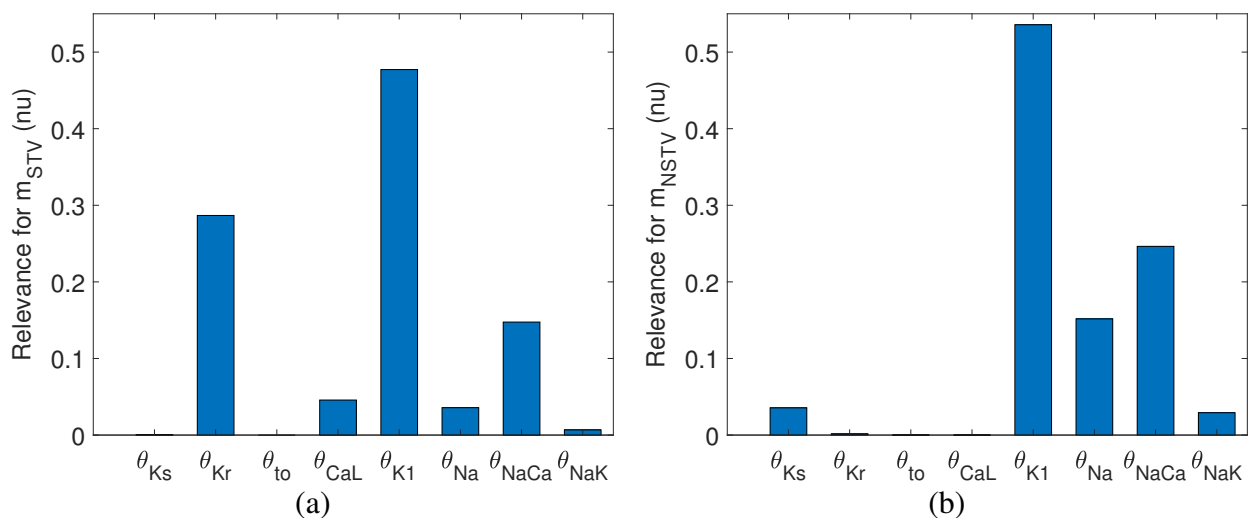

**Figure S4.** Relevant factors for (a)  $m_{STV}$  and (b)  $m_{NSTV}$  following constant  $\beta$ -adrenergic stimulation and mechanical stretch.

## REFERENCES

- Benoist, D., Stones, R., Benson, A. P., Fowler, E. D., Drinkhill, M. J., Hardy, M. E., et al. (2014). Systems approach to the study of stretch and arrhythmias in right ventricular failure induced in rats by monocrotaline. *Prog. Biophys. Mol. Biol.* 115, 162–172. doi:10.1016/J.PBIOMOLBIO.2014.06.008
- Deo, M., Ruan, Y., Pandit, S. V., Shah, K., Berenfeld, O., Blaufox, A., et al. (2013). KCNJ2 mutation in short QT syndrome 3 results in atrial fibrillation and ventricular proarrhythmia. *Proc. Natl. Acad. Sci. U. S. A.* 110, 4291–4296. doi:10.1073/pnas.1218154110

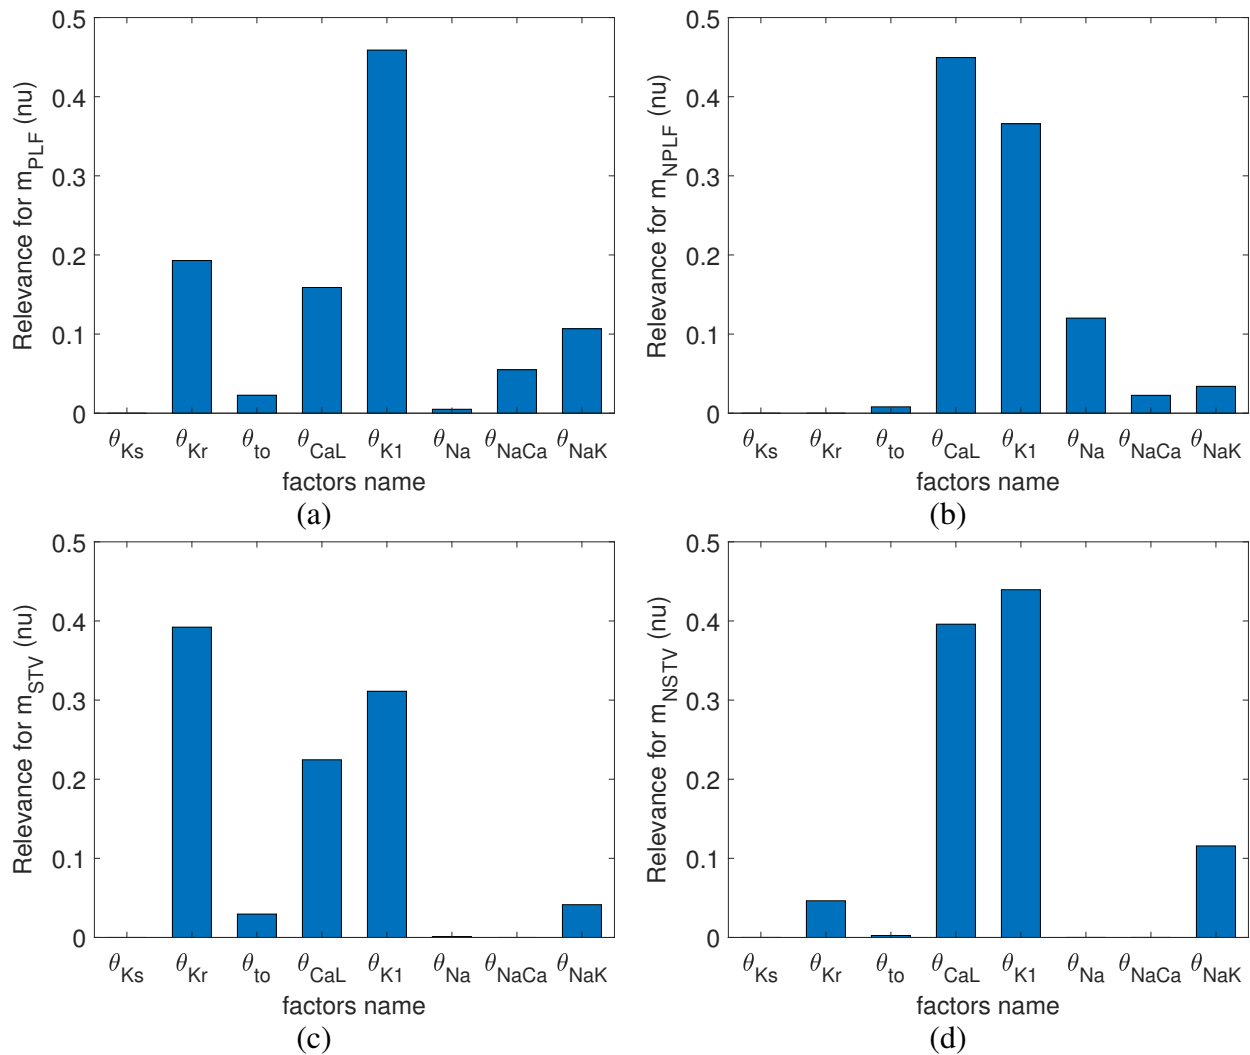

**Figure S5.** Relevant factors for (a)  $m_{PLF}$ , (b)  $m_{NPLF}$ , (c)  $m_{STV}$ , and (d)  $m_{NSTV}$  following sympathetic provocation under physiological conditions.

- Fedida, D. and Giles, W. R. (1991). Regional variations in action potentials and transient outward current in myocytes isolated from rabbit left ventricle. *J. Physiol.* 442, 191–209
- Guia, A., Stern, M. D., Lakatta, E. G., and Josephson, I. R. (2001). Ion concentration-dependence of rat cardiac unitary l-type calcium channel conductance. *Biophys. J.* 80, 2742–2750
- Healy, S. N. and McCulloch, A. D. (2005). An ionic model of stretch-activated and stretch-modulated currents in rabbit ventricular myocytes. *Europace* 7, S128–S134. doi:10.1016/j.eupc.2005.03.019
- Iribe, G., Kaneko, T., Yamaguchi, Y., and Naruse, K. (2014). Load dependency in force–length relations in isolated single cardiomyocytes. *Prog. Biophys. Mol. Biol.* 115, 103–114. doi:10.1016/J.PBIOMOLBIO.2014.06.005
- Isenberg, G., Kazanski, V., Kondratev, D., Gallitelli, M. F., Kiseleva, I., and Kamkin, A. (2003). Differential effects of stretch and compression on membrane currents and  $[Na^+]_c$  in ventricular myocytes. *Prog. Biophys. Mol. Biol.* 82, 43–56
- Kamkin, A., Kiseleva, I., and Isenberg, G. (2000). Stretch-activated currents in ventricular myocytes: amplitude and arrhythmogenic effects increase with hypertrophy. *Cardiovasc. Res.* 48, 409–420. doi:10.1016/S0008-6363(00)00208-X

- Kohl, P., Day, K., and Noble, D. (1998). Cellular mechanisms of cardiac mechano-electric feedback in a mathematical model. *Can. J. Cardiol.* 14, 111–9
- Kohl, P., Hunter, P., and Noble, D. (1999). Stretch-induced changes in heart rate and rhythm: clinical observations, experiments and mathematical models. *Prog. Biophys. Mol. Biol.* 71, 91–138. doi:10.1016/S0079-6107(98)00038-8
- Nakayama, T. and Irisawa, H. (1985). Transient outward current carried by potassium and sodium in quiescent atrioventricular node cells of rabbits. *Circ. Res.* 57, 65–73
- O’Hara, T., Virág, L., Varró, A., and Rudy, Y. (2011). Simulation of the undiseased human cardiac ventricular action potential: model formulation and experimental validation. *PLoS Comput. Biol.* 7, e1002061
- Pagani, M., Montano, N., Porta, A., Malliani, A., Abboud, F. M., Birkett, C., et al. (1997). Relationship between spectral components of cardiovascular variabilities and direct measures of muscle sympathetic nerve activity in humans. *Circulation* 95, 1441–1448
- Priest, J. R., Gawad, C., Kahlig, K. M., Yu, J. K., O’Hara, T., Boyle, P. M., et al. (2016). Early somatic mosaicism is a rare cause of long-QT syndrome. *Proc. Natl. Acad. Sci. U. S. A.* 113, 11555–11560. doi:10.1073/pnas.1607187113
- Pueyo, E., Corrias, A., Virág, L., Jost, N., Szél, T., Varró, A., et al. (2011). A multiscale investigation of repolarization variability and its role in cardiac arrhythmogenesis. *Biophys. J.* 101, 2892–2902
- Pueyo, E., Orini, M., Rodríguez, J. F., and Taggart, P. (2016). Interactive effect of beta-adrenergic stimulation and mechanical stretch on low-frequency oscillations of ventricular action potential duration in humans. *J. Mol. Cell. Cardiol.* 97, 93–105. doi:10.1016/j.yjmcc.2016.05.003
- Shibasaki, T. (1987). Conductance and kinetics of delayed rectifier potassium channels in nodal cells of the rabbit heart. *J. Physiol.* 387, 227–50
- Tan, J. H. C., Liu, W., and Saint, D. A. (2004). Differential expression of the mechanosensitive potassium channel *TREK-1* in epicardial and endocardial myocytes in rat ventricle. *Exp. Physiol.* 89, 237–242. doi:10.1113/expphysiol.2003.027052
- ten Tusscher, K. H. and Panfilov, A. V. (2006). Alternans and spiral breakup in a human ventricular tissue model. *Am. J. Physiol.: Heart Circ. Physiol.* 291, H1088–H1100
- Veldkamp, M. W., van Ginneken, A. C., Opthof, T., and Bouman, L. N. (1995). Delayed rectifier channels in human ventricular myocytes. *Circulation* 92, 3497–3504
- Weise, L. D. and Panfilov, A. V. (2013). A discrete electromechanical model for human cardiac tissue: effects of stretch-activated currents and stretch conditions on restitution properties and spiral wave dynamics. *PLoS One* 8, e59317
